# Supplementary material for: Nutritional, Textural, and Sensory Attributes of Protein Bars Formulated with Mycoproteins
Source: MDPI journal article supplement (doi:10.3390/foods13050671), 2024-02-23
Supplement: s1 [file s1]

**Table S1. The major nutrition profiles of mycoprotein (per 100 g).**

| <b>Items</b>        | <b>Results</b> |
|---------------------|----------------|
| Proteins            | 35.6           |
| Total fat           | 7.8            |
| Ash content         | 4.6            |
| Total dietary fiber | 42.9           |

**Table S2. The definitions of sensory attributes.**

| <b>Attributes</b>         | <b>Definitions</b>                                                                                                                     |
|---------------------------|----------------------------------------------------------------------------------------------------------------------------------------|
| <b>Appearance</b>         | the extent to which the smoothness and graininess of the bar surface is found to be appealing                                          |
| <b>Color</b>              | the uniformity of the color of the bar                                                                                                 |
| <b>Odor</b>               | the extent to which the smell of the bar is found to be pleasant                                                                       |
| <b>Taste</b>              | the extent to which the balance of the sweetness, saltiness, the milky and the mushroom-like flavor of the bar is found to be pleasant |
| <b>Aftertaste</b>         | the extent of the pleasant taste left in the mouth after swallowing                                                                    |
| <b>Texture</b>            | the extent to which the rigidness, fragility, firmness and elasticity of the bar is found to be pleasant by the mouth                  |
| <b>Overall acceptance</b> | the extent to which the overall quality of the bar is found to be pleasant                                                             |

**Table S3. Amino acids content comparison of mycoprotein and other proteins.**

| Amino acids                              | MP           | Soy*        | Wheat*      | Pea*        | Corn*       | Potato*     | Egg*        | Whey*       | Milk*       |
|------------------------------------------|--------------|-------------|-------------|-------------|-------------|-------------|-------------|-------------|-------------|
| <b>Essential amino acids (EAAs)</b>      |              |             |             |             |             |             |             |             |             |
| Threonine                                | 2.20         | 2.3         | 1.8         | 2.5         | 1.8         | 4.1         | 2.0         | 5.4         | 3.5         |
| Methionine                               | 1.42         | 0.3         | 0.7         | 0.3         | 1.1         | 1.3         | 1.4         | 1.8         | 2.1         |
| Phenylalanine                            | 1.69         | 3.2         | 3.7         | 3.7         | 3.4         | 4.2         | 2.3         | 2.5         | 3.5         |
| Histidine                                | 0.91         | 1.5         | 1.4         | 1.6         | 1.1         | 1.4         | 0.9         | 1.4         | 1.9         |
| Lysine                                   | 3.52         | 3.4         | 1.1         | 4.7         | 1.0         | 4.8         | 2.7         | 7.1         | 5.9         |
| Valine                                   | 3.97         | 2.2         | 2.3         | 2.7         | 2.1         | 3.7         | 2.0         | 3.5         | 3.6         |
| Isoleucine                               | 2.04         | 1.9         | 2.0         | 2.3         | 1.7         | 3.1         | 1.6         | 3.8         | 2.9         |
| Leucine                                  | 3.26         | 5.0         | 5.0         | 5.7         | 8.8         | 6.7         | 3.6         | 8.6         | 7.0         |
| <b>Σ EAA</b>                             | <b>19.01</b> | <b>19.9</b> | <b>18.0</b> | <b>23.6</b> | <b>21.0</b> | <b>29.3</b> | <b>16.5</b> | <b>34.1</b> | <b>30.3</b> |
| <b>Non-essential amino acids (NEAAs)</b> |              |             |             |             |             |             |             |             |             |
| Serine                                   | 1.95         | 3.4         | 3.5         | 3.6         | 2.9         | 3.4         | 3.3         | 4.0         | 4.0         |
| Glycine                                  | 1.93         | 2.7         | 2.4         | 2.8         | 1.6         | 3.2         | 1.4         | 1.5         | 1.5         |
| Glutamic acid                            | 4.22         | 12.4        | 26.9        | 12.9        | 13.1        | 7.1         | 5.1         | 15.5        | 16.7        |
| Proline                                  | 2.22         | 3.3         | 8.8         | 3.1         | 5.2         | 3.3         | 1.8         | 4.8         | 7.3         |
| Cysteine                                 | ND           | 0.2         | 0.7         | 0.2         | 0.3         | 0.3         | 0.4         | 0.8         | 0.2         |
| Alanine                                  | 2.82         | 2.8         | 1.8         | 3.2         | 4.8         | 3.3         | 2.6         | 4.2         | 2.6         |
| Tyrosine                                 | 1.53         | 2.2         | 2.4         | 2.6         | 2.7         | 3.8         | 1.8         | 2.4         | 3.8         |
| Arginine                                 | 2.66         | 4.8         | 2.4         | 5.9         | 1.7         | 3.3         | 2.6         | 1.7         | 2.6         |
| Aspartate                                | 3.02         | ND          |
| <b>Σ NEAA</b>                            | <b>17.33</b> | 31.9        | 48.9        | 34.4        | 32.3        | 27.8        | 19.0        | 34.9        | 38.6        |
| <b>Σ TAA (Total amino acids)</b>         | <b>39.36</b> | <b>51.8</b> | <b>66.9</b> | <b>58.0</b> | <b>53.3</b> | <b>57.1</b> | <b>35.5</b> | <b>69.0</b> | <b>68.9</b> |

Note: Values are presented in g per 100 g raw material. \*Data obtained from Stefan H. M. Gorissen. *et.al*.
